# Supplementary material for: ZnO-decorated green-synthesized multi-doped carbon dots from Chlorella pyrenoidosa for sustainable photocatalytic carbamazepine degradation
Source: Royal Society of Chemistry journal article supplement (doi:10.1039/d3ra04188c), 2023-01-01
Supplement: d3ra04188c1.pdf [file d3ra04188c1.pdf]

## Supplementary material

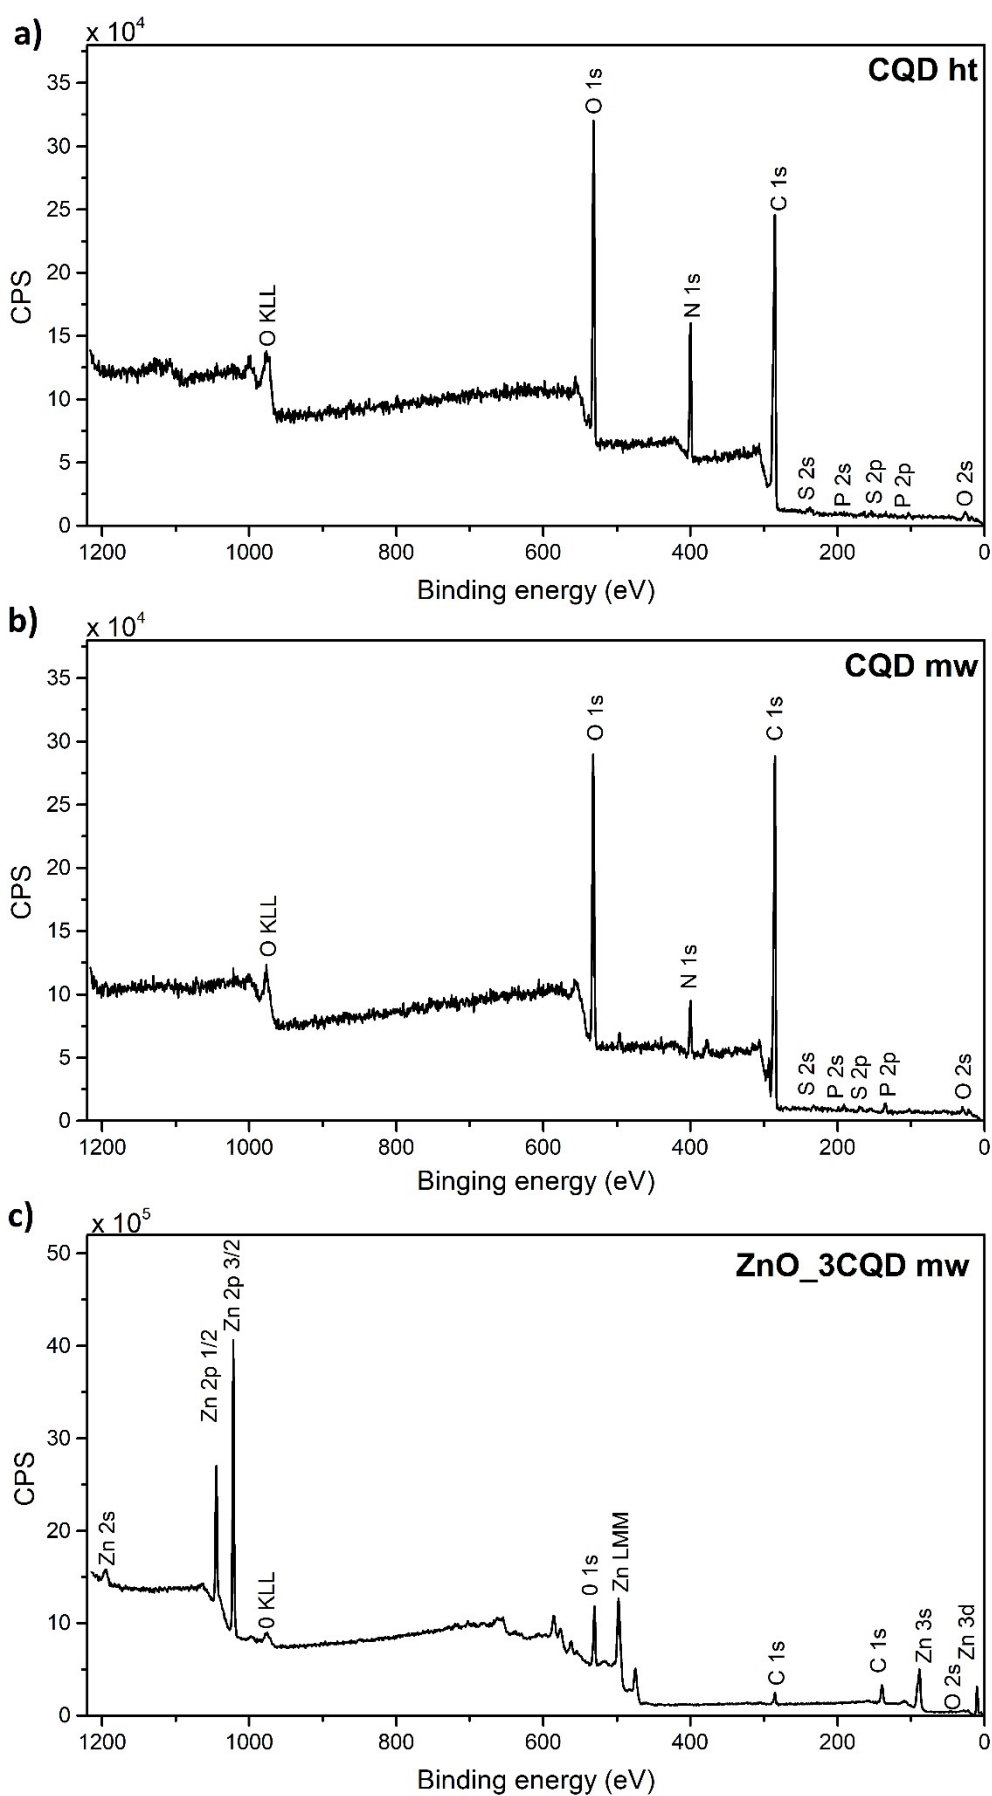

**Figure S1.** XPS survey spectrum of CD\_ht (a), CD\_mw (b) and ZnO\_3CD\_mw (c).

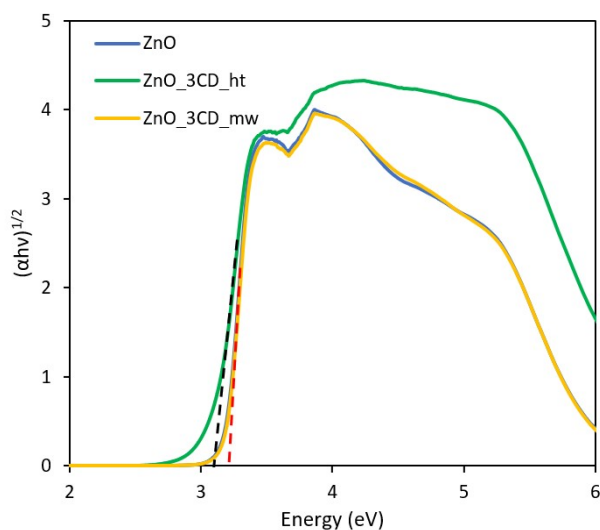

**Figure S2.** Tauc plot of ZnO, ZnO\_CD\_ht, and ZnO\_3CD\_mw.

**Table S1.** Results of PL deconvolution on ZnO, ZnO\_3CD\_ht and ZnO\_3CD\_ht samples

| Emission range (nm) | Peak area of the sample |            |            |
|---------------------|-------------------------|------------|------------|
|                     | ZnO                     | ZnO_3CD_ht | ZnO_3CD_mw |
| 500-530             | 5.5%                    | 6.7%       | 8.1%       |
| 560-580             | 16.7%                   | 36.5%      | 33.1%      |
| 630-640             | 38.3%                   | 34.7%      | 35.8%      |
| 635-700             | 39.5%                   | 18.4%      | 2.4%       |
| 710-760             | -                       | 3.8%       | 20.6%      |

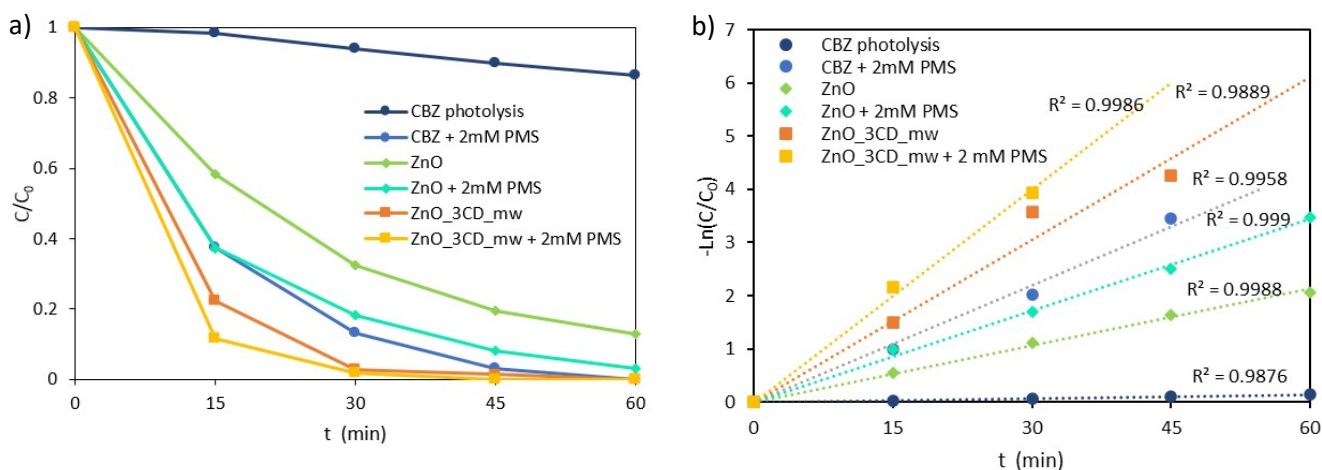

**Figure S3.** Degradation of CBZ by photolysis, and photocatalysis in the presence of ZnO and ZnO-3CD\_mw with and without PMS addition; the plots of  $C/C_0$  versus time (a) and plots of  $-\ln(C/C_0)$  versus time (b). Experimental conditions:  $C_{CBZ} = 14 \text{ mg} \cdot \text{dm}^{-3}$ , photocatalyst loading of  $0.5 \text{ g} \cdot \text{dm}^{-3}$ ,  $C_{PMS} = 2 \text{ mM}$ , temperature  $20 \text{ }^\circ\text{C}$ , light source: Xe lamp.

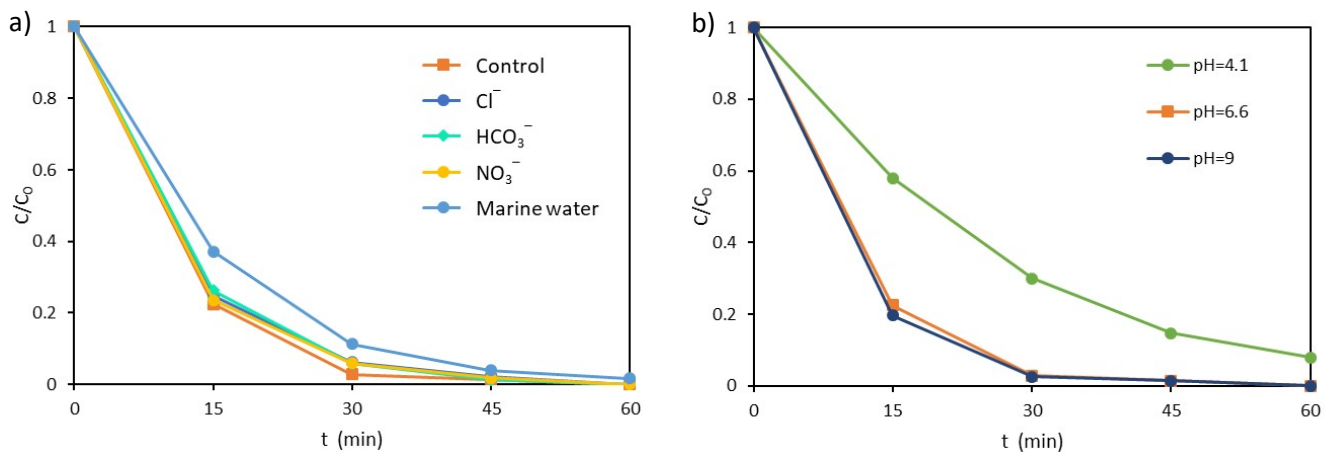

**Figure S4.** Effects of selected ions (a) and pH (b) on the photocatalytic degradation of CBZ in the presence of ZnO-3CD\_mw. Experimental conditions:  $C_{\text{CBZ}} = 14 \text{ mg} \cdot \text{dm}^{-3}$ , photocatalyst loading of  $0.5 \text{ g} \cdot \text{dm}^{-3}$ ,  $C_{\text{ions}} = 10 \text{ mM}$ , temperature  $20 \text{ }^\circ\text{C}$ , light source: Xe lamp.
